# Supplementary material for: HDL in COVID-19 Patients: Evidence from an Italian Cross-Sectional Study
Source: MDPI journal article supplement (doi:10.3390/jcm10245955), 2021-12-18
Supplement: s1 [file s1]

## Supplemental Tables

**Supplementary Table S1.** Associations between triglycerides and white blood cells in COVID-19 patients, univariate linear regression models.

|                   | $\beta$      | SE           | 95% CI       |              | P-value       |
|-------------------|--------------|--------------|--------------|--------------|---------------|
| White blood cells | <b>0.004</b> | <b>0.002</b> | <b>0.001</b> | <b>0.007</b> | <b>0.0124</b> |
| Lymphocytes       | <b>0.008</b> | <b>0.003</b> | <b>0.002</b> | <b>0.014</b> | <b>0.0086</b> |
| Basophils         | <b>0.602</b> | <b>0.247</b> | <b>0.118</b> | <b>1.087</b> | <b>0.0148</b> |
| Monocytes         | 0.030        | 0.020        | -0.010       | 0.070        | 0.1369        |
| Eosinophils       | 0.080        | 0.058        | -0.034       | 0.193        | 0.1678        |
| Neutrophils       | 0.002        | 0.002        | -0.001       | 0.006        | 0.2452        |

**Supplementary Table S2.** Descriptive statistics of white blood cells count in COVID-19 patients.

|                                        | Mean    | STD     | Median  | Q1      | Q3       |
|----------------------------------------|---------|---------|---------|---------|----------|
| WBC, $\times 10^3/\mu\text{L}$         | 8143.90 | 3853.20 | 7610.00 | 5340.00 | 10250.00 |
| Neutrophils, $\times 10^3/\mu\text{L}$ | 6346.57 | 3290.49 | 5840.00 | 3680.00 | 8290.00  |
| Lymphocytes, $\times 10^3/\mu\text{L}$ | 1253.14 | 1933.42 | 870.00  | 640.00  | 1220.00  |
| Monocytes, $\times 10^3/\mu\text{L}$   | 474.19  | 299.58  | 420.00  | 280.00  | 600.00   |
| Eosinophils, $\times 10^3/\mu\text{L}$ | 49.62   | 105.12  | 10.00   | 0.00    | 60.00    |
| Basophils, $\times 10^3/\mu\text{L}$   | 20.77   | 24.32   | 10.00   | 10.00   | 20.00    |

STD, standard deviation; Q, quartile.
